# Supplementary material
Source: Springer Nature journal article supplement (https://www.springermedizin.de/resource/supplementary/12943_2013_1112_MOESM5_ESM.pdf/9552520)

**RAR $\alpha$** **Akt****merge****NS**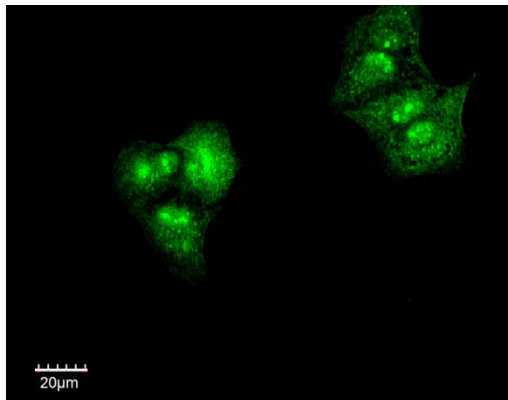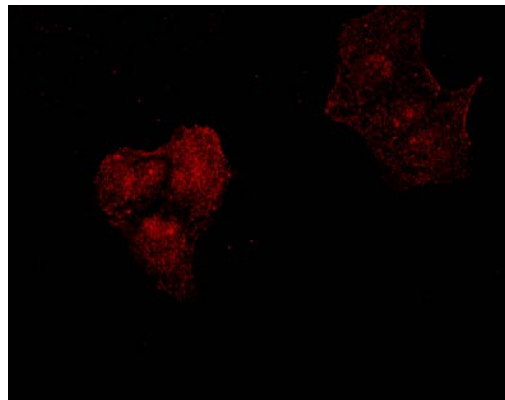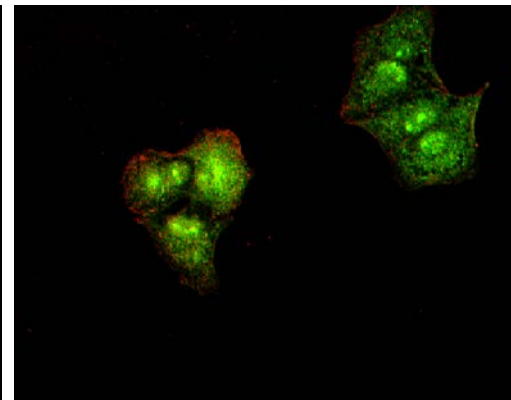**5 min**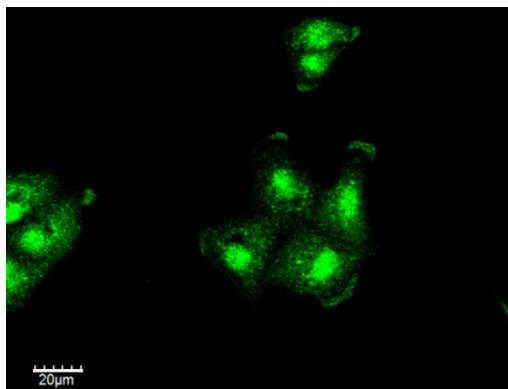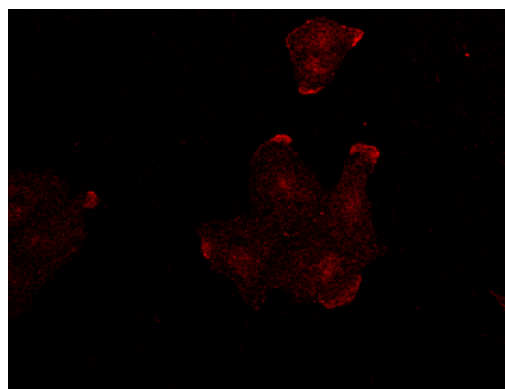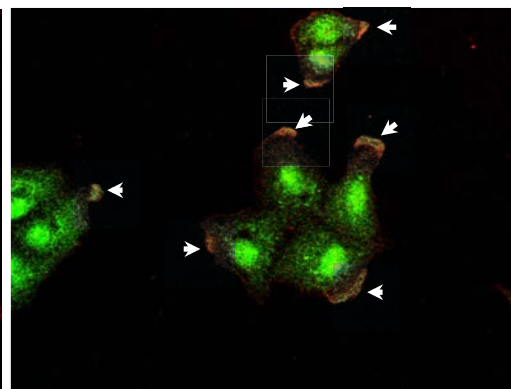**ATRA****15 min**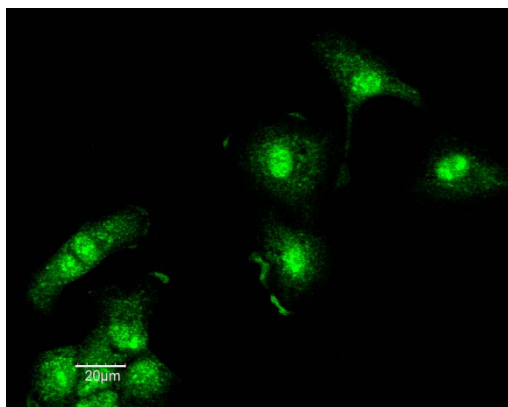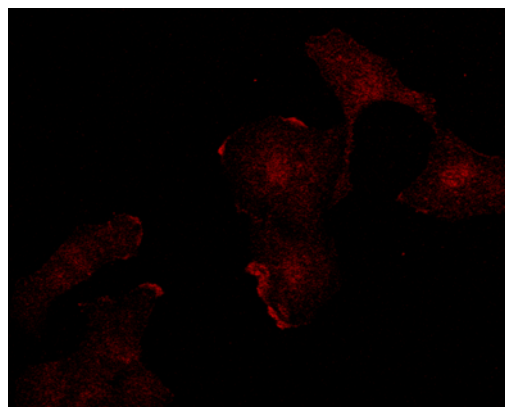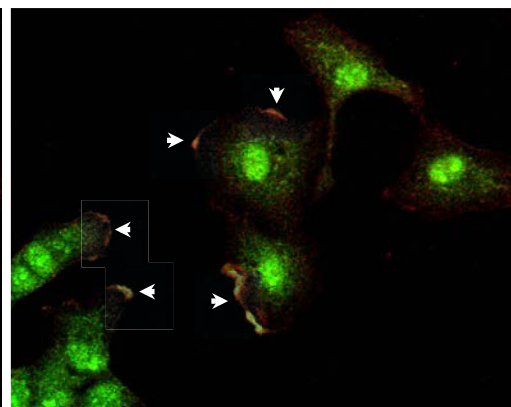

Supplement: MOESM5 [file 9552520]
